# Supplementary material for: Relationships Between Metabolic Body Composition Status and Rapid Kidney Function Decline in a Community-Based Population: A Prospective Observational Study
Source: Frontiers journal article supplement (doi:10.3389/fpubh.2022.895787), 2022-06-03
Supplement: Table_1.pdf [file Table_1.pdf]

Supplementary Table 1. Metabolic body composition status classification

| BMI < 24 kg/m <sup>2</sup> |                                                 | BMI ≥ 24 kg/m <sup>2</sup>                   |
|----------------------------|-------------------------------------------------|----------------------------------------------|
| Metabolically healthy      | Metabolically healthy normal weight<br>(MHNW)   | Metabolically healthy Overweight<br>(MHOW)   |
| Metabolically unhealthy    | Metabolically unhealthy normal weight<br>(MUNW) | Metabolically unhealthy overweight<br>(MUOW) |

\*Metabolically healthy: HOMA-IR score < 2.5 without metabolic syndrome

\*Metabolically unhealthy: HOMA-IR score ≥ 2.5 or with metabolic syndrome
